# Supplementary material for: Three-dimensional monolithic integration in flexible printed organic transistors
Source: PubMed Central journal article supplement (PMC6318314; doi:10.1038/s41467-018-07904-5), 2019-01-03
Supplement: 41467_2018_7904_MOESM1_ESM.pdf [file 41467_2018_7904_MOESM1_ESM.pdf]

**Supplementary Information**

**Three-dimensional monolithic integration  
in flexible printed organic transistors**

*Kwon et al.*

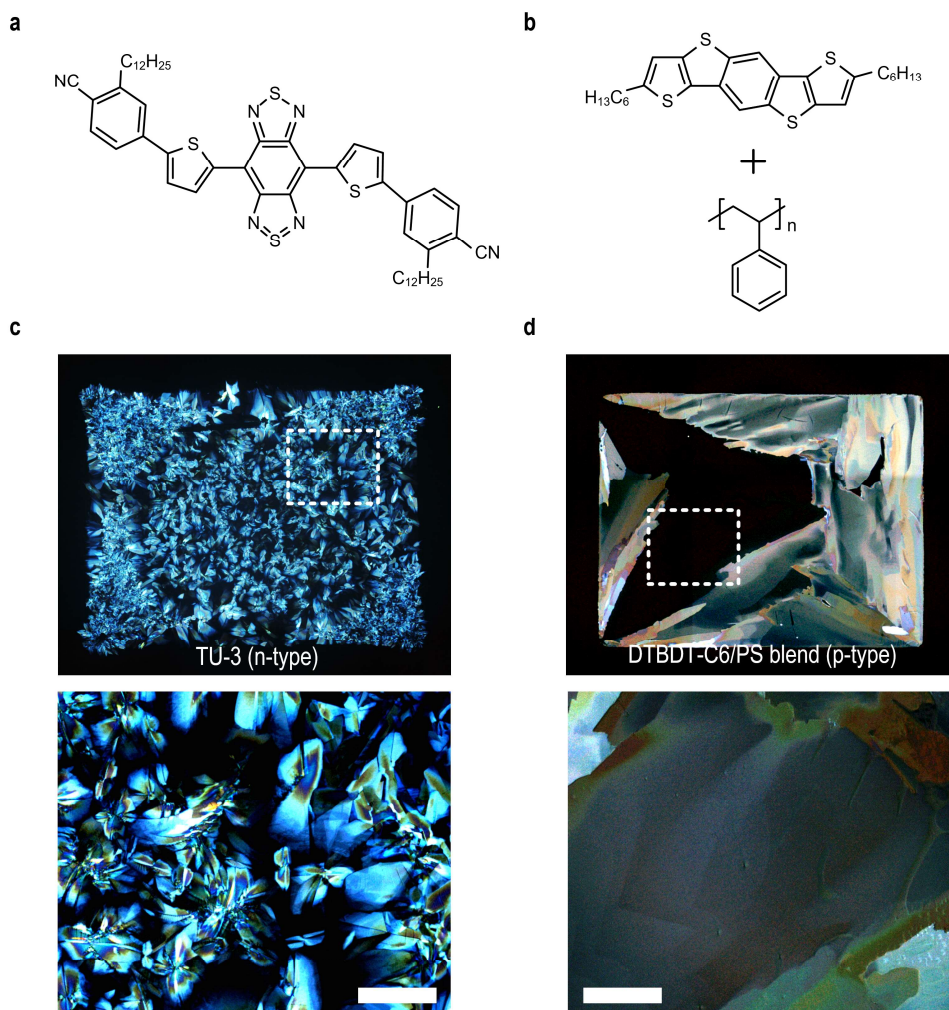

**Supplementary Figure 1** Molecular structures of complementary OSCs. **a** An n-type small molecule TU-3. **b** A p-type small molecule DTBDT-C<sub>6</sub> (top) blended with an insulating polymer PS (bottom). Polarized light microscopy of the printed complementary OSCs: **c** TU-3 and **d** DTBDT-C<sub>6</sub>/PS blend (the white dashed image areas are magnified, scale bars are 50  $\mu\text{m}$ ).

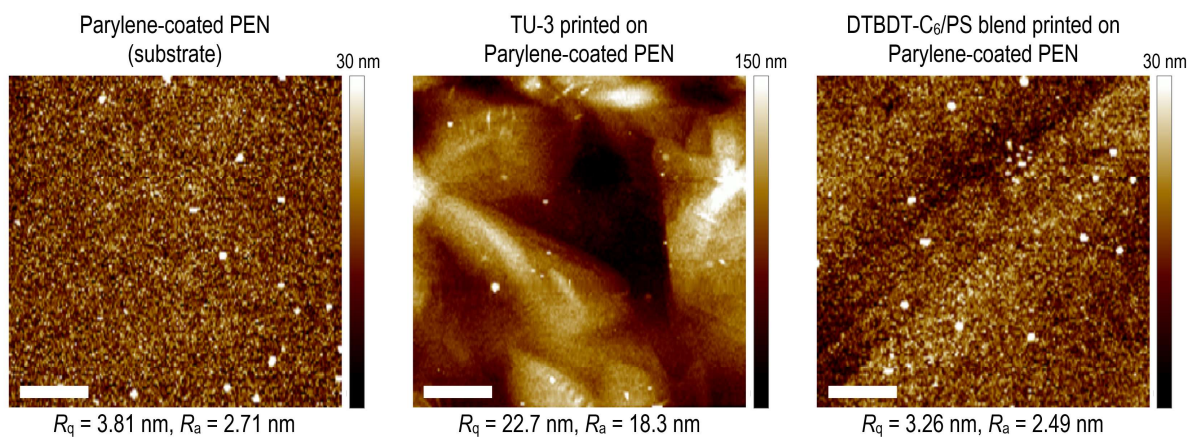

**Supplementary Figure 2** AFM topology images (scan area =  $50 \times 50 \mu\text{m}$ , scale bar length =  $10 \mu\text{m}$ ) of a Parylene-coated PEN substrate, a TU-3 layer and a DTBDT-C<sub>6</sub>/PS blend layer printed on the substrate ( $R_q$ : root-mean-square roughness,  $R_a$ : average roughness).

**Supplementary Table 1** Summary of manufacturing process of a stacked 3-T device (24 functional layers and a via-hole).

| Transistor Floor | #  | Layer Index | Layer Description                                             | Material                  | Process          | Annealing                                                  |
|------------------|----|-------------|---------------------------------------------------------------|---------------------------|------------------|------------------------------------------------------------|
| -                | 1  | <b>SUB</b>  | Flexible substrate                                            | PEN                       | -                | -                                                          |
|                  | 2  | <b>BASE</b> | Basement                                                      | Parylene diX-SR           | CVD              | -                                                          |
| 1F               | 3  | <b>M1</b>   | Metal routing / bottom-gate electrode                         | NPS-JL                    | IJP <sup>a</sup> | 120 °C for 30 min in air                                   |
|                  | 4  | <b>D1</b>   | Bottom-gate dielectric (180 nm)                               | Parylene diX-SR           | CVD              | -                                                          |
|                  | 5  | <b>M2</b>   | Metal routing / source and drain electrode                    | NPS-JL                    | IJP              | 120 °C for 30 min in air                                   |
|                  | 6  | <b>BK1</b>  | Hydrophobic bank for semiconductor patterning                 | AF1600                    | Dispensing       | 120 °C for 30 min in nitrogen                              |
|                  | 7  | <b>SAM1</b> | Self-assembled monolayer (lowering the WF <sup>b</sup> of Ag) | 4-MBT                     | Dipping          | -                                                          |
|                  | 8  | <b>OSC1</b> | Organic semiconductor (p-type)                                | TU-3                      | Dispensing       | 60 °C for 30 min in air,<br>120 °C for 30 min in nitrogen  |
|                  | 9  | <b>D2</b>   | Top-gate dielectric (180 nm)                                  | Parylene diX-SR           | CVD              | -                                                          |
| 1F/2F            | 10 | <b>M3</b>   | Metal routing / top-gate for 1F / bottom-gate for 2F          | NPS-JL                    | IJP              | 120 °C for 30 min in air                                   |
| 2F               | 11 | <b>D3</b>   | Bottom-gate dielectric (360 nm)                               | Parylene diX-SR           | CVD              | -                                                          |
|                  | 12 | <b>M4</b>   | Metal routing / source and drain electrode                    | NPS-JL                    | IJP              | 120 °C for 30 min in air                                   |
|                  | 13 | <b>BK2</b>  | Hydrophobic bank for semiconductor patterning                 | AF1600                    | Dispensing       | 120 °C for 30 min in nitrogen                              |
|                  | 14 | <b>SAM2</b> | Self-assembled monolayer (increasing the WF of Ag)            | PFBT                      | Dipping          | -                                                          |
|                  | 15 | <b>OSC2</b> | Organic semiconductor (p-type)                                | DTBDT-C <sub>6</sub> / PS | Dispensing       | Room temp. for 30 min in air                               |
|                  | 16 | <b>D4</b>   | Top-gate dielectric (360 nm)                                  | Parylene diX-SR           | CVD              | -                                                          |
| 2F/3F            | 17 | <b>M5</b>   | Metal routing / bottom-gate for 2F / top-gate for 3F          | NPS-JL                    | IJP              | 120 °C for 30 min in air                                   |
| 3F               | 18 | <b>D5</b>   | Bottom dielectric for 3F (180 nm)                             | Parylene diX-SR           | CVD              | -                                                          |
|                  | 19 | <b>M6</b>   | Metal routing / source and drain electrode                    | NPS-JL                    | IJP              | 120 °C for 30 min in air                                   |
|                  | 20 | <b>BK3</b>  | Hydrophobic bank for semiconductor patterning                 | AF1600                    | Dispensing       | 120 °C for 30 min in nitrogen                              |
|                  | 21 | <b>SAM3</b> | Self-assembled monolayer (lowering WF of Ag)                  | 4-MBT                     | Dipping          | -                                                          |
|                  | 22 | <b>OSC3</b> | Organic semiconductor (n-type)                                | TU-3                      | Dispensing       | 60 °C for 30 min in air /<br>120 °C for 30 min in nitrogen |
|                  | 23 | <b>D6</b>   | Top gate dielectric for 2F (180 nm)                           | Parylene diX-SR           | CVD              | -                                                          |
|                  | 24 | <b>Via</b>  | Laser drilling for interconnection                            | -                         | Laser            | -                                                          |
|                  | 25 | <b>M7</b>   | Metal routing, top-gate electrode, via-hole filling           | NPS-JL                    | IJP              | 120 °C for 30 min in air                                   |

<sup>a</sup> inkjet printing, <sup>b</sup> work function

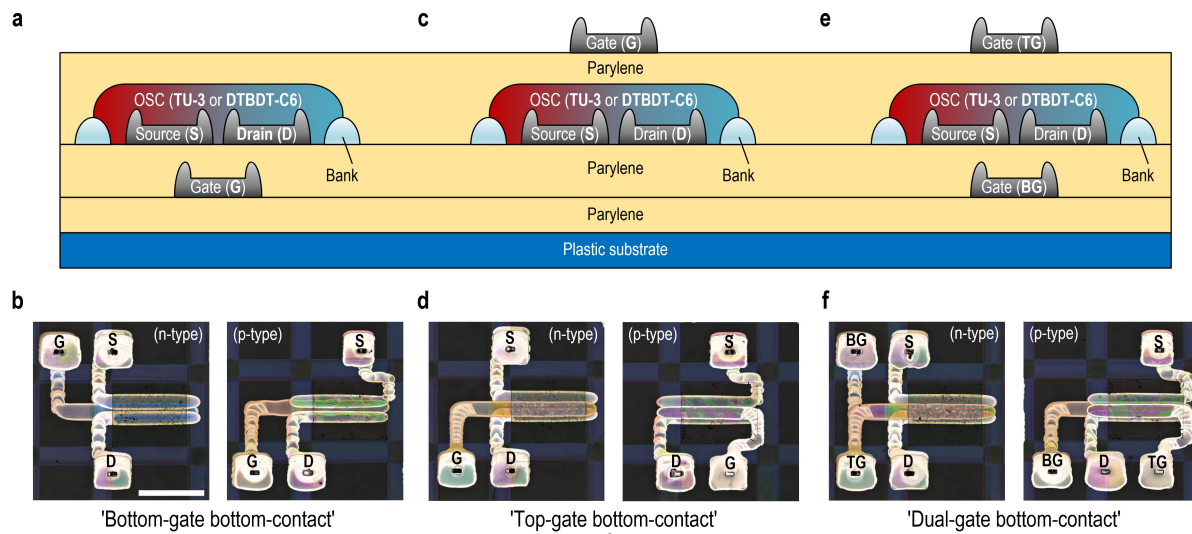

**Supplementary Figure 3** Schematic cross-section and microscopic images of the stand-alone complementary transistors. **a, b** Bottom-gate bottom-contact transistors. **c, d** Top-gate bottom-contact transistors. **e, f** Dual-gate bottom-contact transistors. Scale bar is 800  $\mu\text{m}$ .

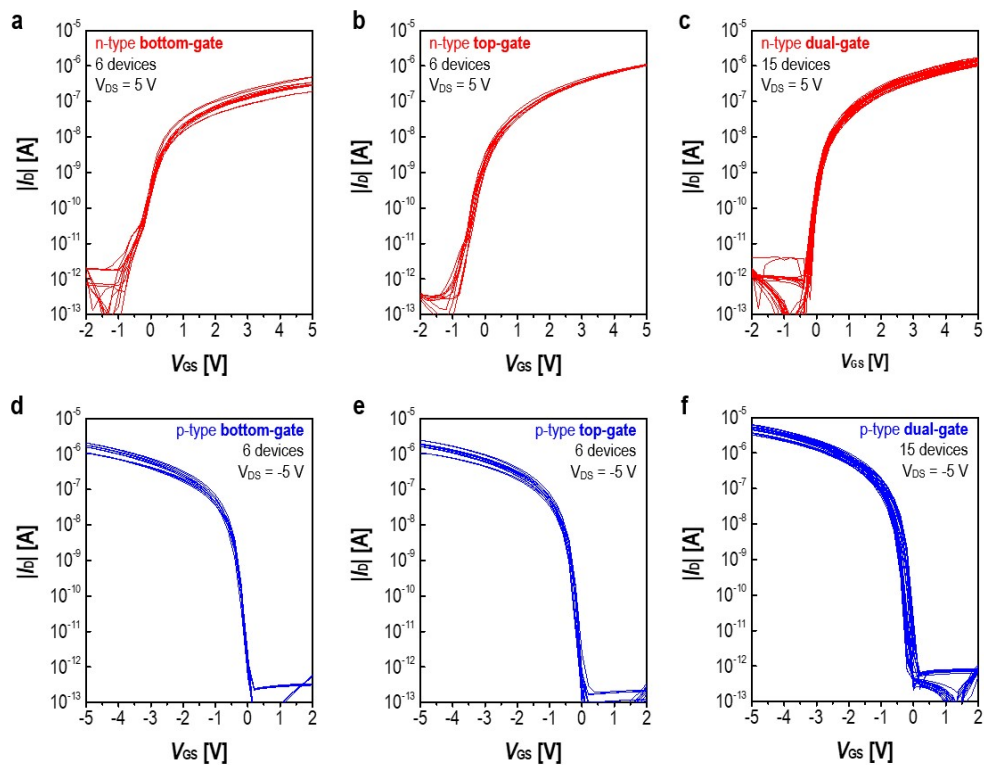

**Supplementary Figure 4** Uniform transfer characteristics of the complementary organic transistors. The n-type single-gate transistors in **a** bottom-gate and **b** top-gate configurations (6 devices for each). **c** The n-Type dual-gate organic transistors (15 devices). The p-type single-gate transistors in **d** bottom-gate and **e** top-gate configurations (6 devices for each). **f** The p-Type dual-gate organic transistors (15 devices).

**Supplementary Table 2** Channel geometries (L and W), extracted carrier mobility in saturation regime, and threshold voltage of the printed transistors of this work (BG: bottom-gate, TG: top-gate, DG: dual-gate).

|                                                                | Stand-alone devices  |                      |                      |                     |                     |                     | Stacked 2-T devices  |                     | Stacked 3-T devices  |                      |                     |
|----------------------------------------------------------------|----------------------|----------------------|----------------------|---------------------|---------------------|---------------------|----------------------|---------------------|----------------------|----------------------|---------------------|
| Type                                                           | n-type               |                      |                      | p-type              |                     |                     | n-type               | p-type              | n-type               |                      | p-type              |
| Structure (Floor)                                              | BG (-)               | TG (-)               | DG (-)               | BG (-)              | TG (-)              | DG (-)              | DG (1F)              | DG (2F)             | DG (1F)              | DG (3F)              | DG (2F)             |
| The number of transistors                                      | 6                    | 6                    | 15                   | 6                   | 6                   | 15                  | 24                   | 24                  | 8                    | 8                    | 8                   |
| $L$ ( $\mu\text{m}$ )                                          | 17.0<br>$\pm 3.8$    | 15.4<br>$\pm 2.4$    | 14.7<br>$\pm 1.3$    | 27.8<br>$\pm 2.5$   | 26.8<br>$\pm 5.5$   | 28.5<br>$\pm 3.7$   | 17.7<br>$\pm 1.6$    | 26.9<br>$\pm 3.5$   | 37.6<br>$\pm 5.8$    | 37.0<br>$\pm 5.5$    | 60.2<br>$\pm 9.5$   |
| $W$ ( $\mu\text{m}$ )                                          | 917<br>$\pm 6$       | 921<br>$\pm 6$       | 916<br>$\pm 4$       | 932<br>$\pm 8$      | 935<br>$\pm 6$      | 937<br>$\pm 8$      | 918<br>$\pm 5$       | 933<br>$\pm 8$      | 917<br>$\pm 6$       | 930<br>$\pm 5$       | 930<br>$\pm 5$      |
| $\mu_{\text{sat}}$ ( $\text{cm}^2\text{V}^{-1}\text{s}^{-1}$ ) | 0.017<br>$\pm 0.003$ | 0.079<br>$\pm 0.002$ | 0.048<br>$\pm 0.001$ | 0.36<br>$\pm 0.11$  | 0.39<br>$\pm 0.09$  | 0.69<br>$\pm 0.14$  | 0.042<br>$\pm 0.009$ | 0.70<br>$\pm 0.19$  | 0.086<br>$\pm 0.020$ | 0.086<br>$\pm 0.017$ | 0.70<br>$\pm 0.29$  |
| $V_{\text{TH}}$ (V)                                            | -0.77<br>$\pm 0.23$  | 0.35<br>$\pm 0.11$   | 0.29<br>$\pm 0.09$   | -0.04<br>$\pm 0.14$ | -0.12<br>$\pm 0.07$ | -0.32<br>$\pm 0.12$ | 0.23<br>$\pm 0.15$   | -0.42<br>$\pm 0.11$ | 0.51<br>$\pm 0.14$   | 0.64<br>$\pm 0.07$   | -0.41<br>$\pm 0.27$ |

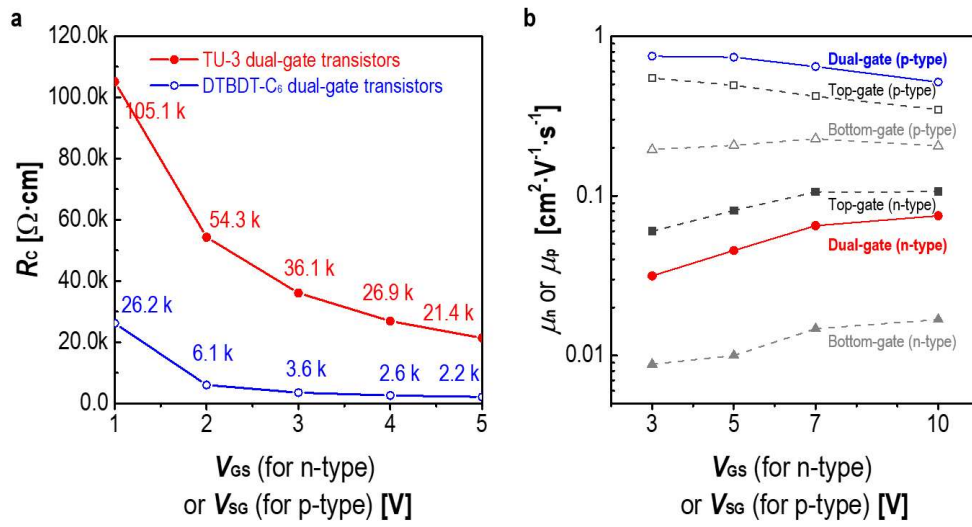

**Supplementary Figure 5 a** Contact resistance of the complementary dual-gate transistors acquired by using a transmission line measurement (TLM) method. In the TLM, the dual-gate transistors with different channel lengths were measured in dual-gate mode operation where top and bottom gates are electrically tied. **b** Gate-bias dependency of carrier mobility in the printed complementary transistors.



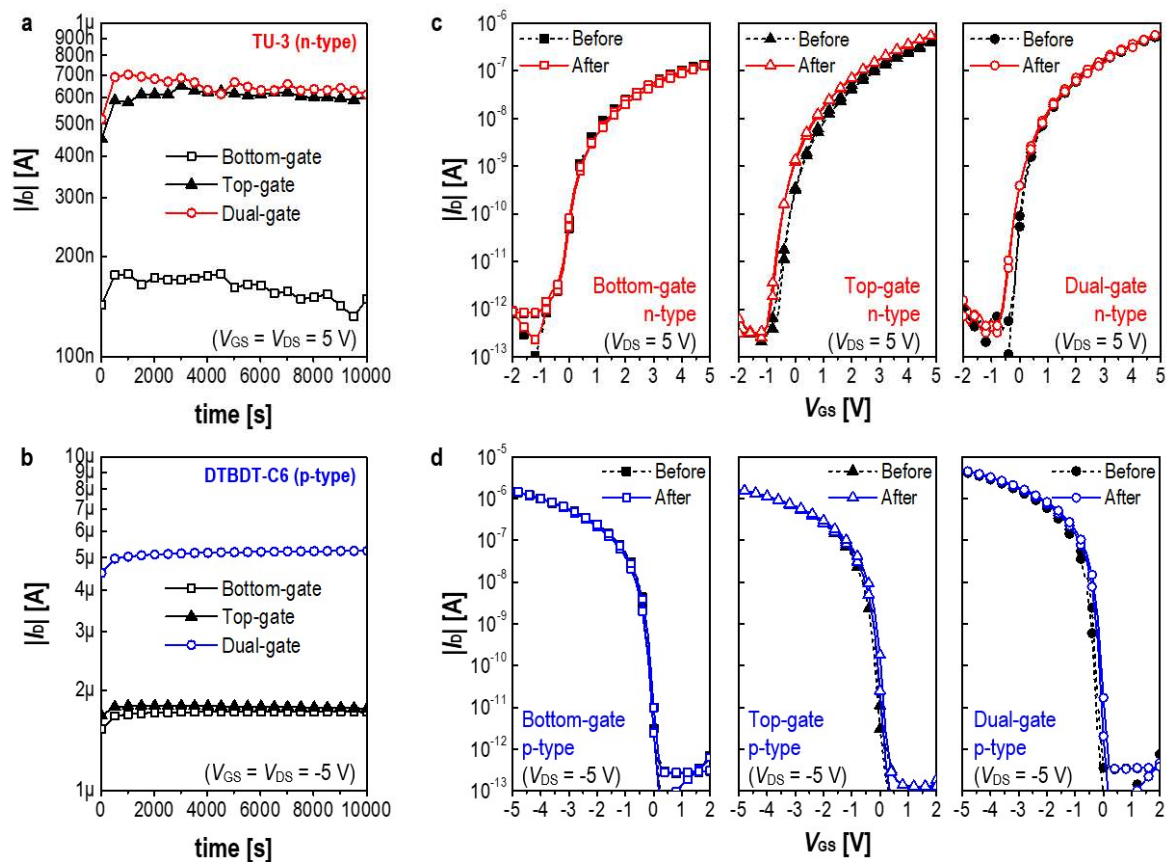

**Supplementary Figure 6** Bias stability test of the printed complementary organic transistors in bottom-gate, top-gate, and dual-gate configurations. **a, b** Transient  $|I_b|$  of the n-type and p-type transistors in their saturation regime. **c, d** The saturation  $|I_b|$ - $V_{GS}$  transfer characteristics of the printed transistors before and after biased for 1000 s.

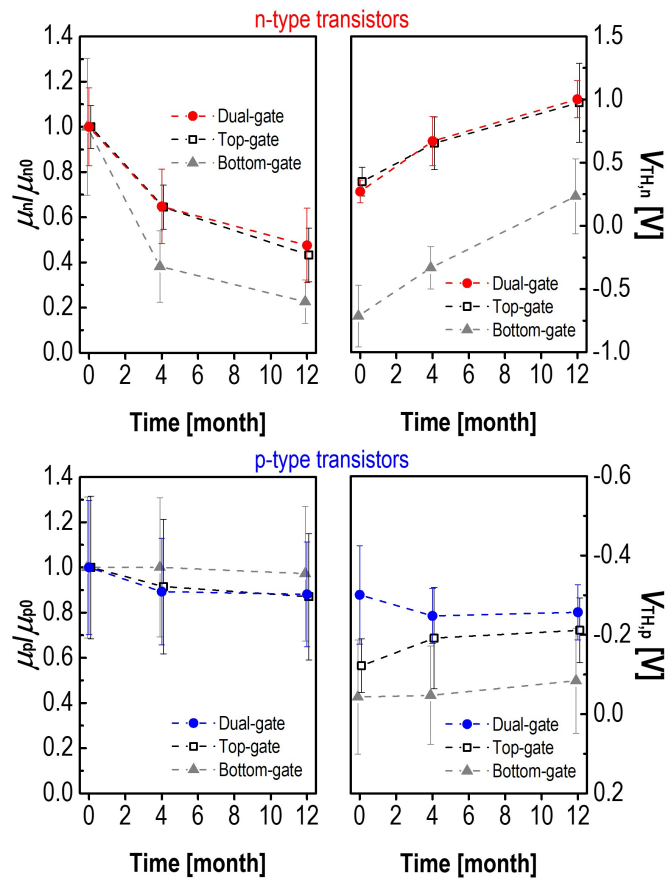

**Supplementary Figure 7** Long-term stability and environmental stress (temperature and humidity) tests. Carrier mobility and  $V_{TH}$  shift of the printed complementary transistors as kept in a dry ambient environment for one year (error bars represent standard deviation).
